# Supplementary material
Source: MDPI journal article supplement (https://www.mdpi.com/2073-445X/11/11/1891)
Supplement: s1 [file s1]

## Supplementary material

Supplementary material of the paper “Territorial inequalities, ecological and material footprints of the energy transition. Case study of The Cantabrian-Mediterranean Bioregion”.

Regarding materials results show the average between high intensity material and low intensity material scenarios.

**Table S1.** Low material intensity scenario and high material intensity scenario for wind turbines [81], [12].

| Material                | t/GW    | t/GW    |
|-------------------------|---------|---------|
| Concrete                | 194,800 | 413,000 |
| Steel                   | 85,600  | 172,100 |
| Polymers                | 3,680   | 4,600   |
| Glass/carbon composites | 6,160   | 8,400   |
| Al                      | 400     | 1,600   |
| B                       | -       | 6       |
| Cr                      | 376     | 580     |
| Cu                      | 760     | 7,000   |
| Dy                      | 1       | 17      |
| Fe                      | 14,400  | 20,800  |
| Mn                      | 624     | 800     |
| Mo                      | 79      | 119     |
| Nd                      | 6       | 183     |
| Ni                      | 89      | 440     |
| Pr                      | -       | 35      |
| Tb                      | -       | 7       |
| Zn                      | 4,400   | 5,500   |

**Table S2.** Low material intensity scenario and high material intensity scenario for PV [81], [12].

| Material | t/MW | t/MW |
|----------|------|------|
| Concrete | 49   | 61   |
| Steel    | 54   | 68   |
| Plastic  | 7    | 9    |
| Glass    | 37   | 46   |
| Al       | 6    | 8    |
| Ag       | 0    | 0    |
| Cu       | 4    | 5    |
| Si       | 1    | 6    |

**Table S3.** Use of materials in CSP [12].

| Material | t/GW    |
|----------|---------|
| Ag       | 14.2    |
| Al       | 9,644   |
| Cr       | 2,800   |
| Cu       | 2,480   |
| Fe       | 547,200 |

|    |       |
|----|-------|
| Mn | 3,480 |
| Mo | 142   |
| Ni | 1,284 |
| Ti | 15    |
| V  | 2     |
| Zn | 950   |

**Table S4.** Use of materials in hydropower [13].

| <b>Material</b> | <b>t/MW</b> |
|-----------------|-------------|
| Cu              | 1.05        |
| Mn              | 0.20        |
| Ni              | 0.03        |
| Al              | 3.40        |
| Cr              | 1.50        |
| Mg              | 0.10        |
| Mo              | 0.25        |
| Zn              | 0.40        |

**Table S5.** Use of materials in bioenergy [13].

| <b>Material</b> | <b>t/MW</b> |
|-----------------|-------------|
| Cu              | 2.27        |
| Ti              | 0.40        |
| Al              | 3.90        |
| Cr              | 0.00        |
| Co              | 0.00        |
| Ni              | 0.02        |
| Zn              | 0.16        |
| Steel           | 5.82        |

**Table S6.** Low material intensity scenario and high material intensity scenario for railway infrastructures [83], [84].

| <b>Material</b> | <b>t/km</b> | <b>t/km</b> |
|-----------------|-------------|-------------|
| Cu              | 11          | 20          |
| Concrete        | 2,111       | 2,111       |
| Steel           | 437         | 437         |
| Al              | 4.38        | 4.38        |
| Sn              | 0.18        | 0.18        |

**Table S7.** Low material intensity scenario and high material intensity scenario for trains [83], [84].

| <b>Material</b> | <b>t/train</b> | <b>t/train</b> |
|-----------------|----------------|----------------|
| Cu              | 3.50           | 34.53          |
| Al              | 90.13          | 90.13          |
| Steel           | 367.80         | 367.80         |

**Table S8.** Low material intensity scenario and high material intensity scenario for electrical transmissions lines based on current grid planning [38]. Material requirements for substations have been obtained from [85].

| Material | t/GW  | t/GW  |
|----------|-------|-------|
| Cu       | 980   | 9,844 |
| Al       | 1,588 | 5,076 |
| Steel    | 587   | 1,722 |

**Table S9.** Low material intensity scenario and high material intensity scenario for technology installation in homes and distribution lines. Demand management has been considered in the low material intensity scenario.

| Technology | Material | kg/unit | kg/unit |
|------------|----------|---------|---------|
| Heat pump  | Cu       | 1.68    | 14.07   |
| EV         | Cu       | 4.30    | 18.11   |

**Table S10.** Low material intensity scenario for electromobility in g/unit.

| Material | Electric bike and Electric scooter <sup>1</sup> | Electric motorcycle <sup>2</sup> | Electric vehicle <sup>3</sup> [80] | Electric bus <sup>4</sup> | Electric light-duty truck <sup>5</sup> | Electric heavy-duty truck <sup>6</sup> |
|----------|-------------------------------------------------|----------------------------------|------------------------------------|---------------------------|----------------------------------------|----------------------------------------|
| Ag       | 0.13                                            | 1.36                             | 34.67                              | 61.65                     | 57.41                                  | 63.33                                  |
| Al       | 776.83                                          | 6,018.76                         | 161,464.68                         | 473,985.13                | 194,535.64                             | 420,830.07                             |
| As       | 0.01                                            | 0.05                             | 0.88                               | 4.51                      | 1.36                                   | 2.67                                   |
| Au       | 0.01                                            | 0.10                             | 2.41                               | 4.40                      | 4.12                                   | 4.37                                   |
| B        | 0.07                                            | 0.99                             | 42.34                              | 67.74                     | 45.16                                  | 95.97                                  |
| Ba       | 22.31                                           | 108.97                           | 1,634.15                           | 9,330.81                  | 2,223.94                               | 5,175.87                               |
| Be       | 0.00                                            | 0.00                             | 0.05                               | 0.08                      | 0.06                                   | 0.07                                   |
| Bi       | 0.52                                            | 2.60                             | 34.50                              | 213.10                    | 51.94                                  | 118.56                                 |
| Cd       | 0.00                                            | 0.01                             | 0.24                               | 0.48                      | 0.32                                   | 0.45                                   |
| Ce       | 0.00                                            | 0.01                             | 0.14                               | 0.94                      | 0.20                                   | 0.51                                   |
| Co       | 0.21                                            | 293.82                           | 2,378.55                           | 1,205.90                  | 581.08                                 | 1,378.00                               |
| Cr       | 28.13                                           | 270.78                           | 6,534.84                           | 21,201.35                 | 8,574.10                               | 20,449.82                              |
| Cu       | 123.09                                          | 1,507.33                         | 44,024.94                          | 85,357.98                 | 58,930.41                              | 94,495.68                              |
| Dy       | 0.08                                            | 1.05                             | 44.18                              | 70.78                     | 47.73                                  | 99.60                                  |
| Er       | -                                               | -                                | -                                  | -                         | -                                      | -                                      |
| Eu       | 0.00                                            | 0.00                             | 0.00                               | 0.00                      | 0.00                                   | 0.00                                   |
| Fe       | 11,756.20                                       | 61,474.94                        | 899,775.17                         | 5,348,064.61              | 1,387,791.77                           | 3,362,505.31                           |
| Ga       | 0.00                                            | 0.01                             | 0.50                               | 0.88                      | 0.74                                   | 1.04                                   |
| Gd       | 0.00                                            | 0.00                             | 0.00                               | 0.01                      | 0.00                                   | 0.00                                   |
| Ge       | 0.00                                            | 0.00                             | 0.01                               | 0.01                      | 0.01                                   | 0.01                                   |
| Hf       | -                                               | -                                | -                                  | -                         | -                                      | -                                      |
| Hg       | 0.00                                            | 0.00                             | 0.02                               | 0.08                      | 0.04                                   | 0.09                                   |
| Ho       | -                                               | -                                | -                                  | -                         | -                                      | -                                      |
| In       | 0.00                                            | 0.00                             | 0.09                               | 0.14                      | 0.14                                   | 0.14                                   |
| Ir       | 0.00                                            | 0.00                             | 0.00                               | 0.00                      | 0.00                                   | 0.00                                   |

|    |        |          |           |           |           |           |
|----|--------|----------|-----------|-----------|-----------|-----------|
| La | 0.05   | 0.26     | 3.67      | 20.84     | 4.74      | 11.37     |
| Li | 20.36  | 344.99   | 5,795.08  | 32,002.41 | 14,817.58 | 37,037.48 |
| Lu | -      | -        | -         | -         | -         | -         |
| Mg | 17.29  | 109.82   | 2,339.42  | 7,708.20  | 3,486.16  | 5,458.22  |
| Mn | 227.97 | 595.64   | 7,139.10  | 27,942.23 | 7,372.37  | 17,606.17 |
| Mo | 7.39   | 40.13    | 559.19    | 3,328.94  | 870.98    | 2,106.55  |
| Nb | 2.98   | 15.37    | 198.23    | 1,291.62  | 309.90    | 766.10    |
| Nd | 1.15   | 15.95    | 719.65    | 1,078.47  | 726.88    | 1,517.96  |
| Ni | 5.65   | 2,364.98 | 19,998.10 | 11,444.78 | 5,179.86  | 12,091.34 |
| Os | -      | -        | -         | -         | -         | -         |
| Pb | 0.30   | 2.77     | 11,561.68 | 215.52    | 148.13    | 213.04    |
| Pd | 0.00   | 0.02     | 0.42      | 0.64      | 0.62      | 0.65      |
| Pr | 0.01   | 0.18     | 6.87      | 9.00      | 7.76      | 10.54     |
| Pt | 0.00   | 0.00     | 0.06      | 0.10      | 0.07      | 0.11      |
| Re | -      | -        | -         | -         | -         | -         |
| Rh | 0.00   | 0.00     | 0.00      | 0.00      | 0.00      | 0.00      |
| Ru | 0.00   | 0.00     | 0.04      | 0.07      | 0.05      | 0.08      |
| Sb | 0.41   | 3.53     | 129.99    | 224.98    | 122.90    | 197.11    |
| Sc | -      | -        | -         | -         | -         | -         |
| Se | 0.00   | 0.03     | 0.58      | 1.16      | 1.13      | 1.15      |
| Sm | -      | -        | -         | -         | -         | -         |
| Sn | 1.50   | 14.43    | 392.53    | 696.41    | 574.84    | 670.71    |
| Sr | 2.74   | 17.38    | 326.28    | 1,180.53  | 551.19    | 810.74    |
| Ta | 0.04   | 0.41     | 11.51     | 17.59     | 17.09     | 18.22     |
| Tb | 0.00   | 0.05     | 2.24      | 3.58      | 2.39      | 5.08      |
| Te | 0.00   | 0.00     | 0.03      | 0.04      | 0.04      | 0.04      |
| Ti | 13.25  | 68.66    | 1,359.72  | 5,817.63  | 1,519.82  | 3,500.93  |
| Tl | 0.00   | 0.00     | 0.00      | 0.00      | 0.00      | 0.00      |
| Tm | -      | -        | -         | -         | -         | -         |
| V  | 1.92   | 10.30    | 146.42    | 857.82    | 219.88    | 535.90    |
| W  | 0.08   | 0.41     | 5.24      | 33.92     | 8.04      | 18.72     |
| Y  | 0.00   | 0.01     | 0.10      | 0.20      | 0.20      | 0.20      |
| Yb | 0.00   | 0.00     | 0.00      | 0.00      | 0.00      | 0.00      |
| Zn | 40.65  | 259.41   | 4,380.02  | 18,182.39 | 6,257.96  | 12,308.97 |
| Zr | 0.04   | 0.30     | 6.23      | 17.82     | 10.48     | 15.48     |

<sup>1</sup>LMO battery. <sup>2</sup>NMC battery. <sup>3</sup> 60% NMC 811; 30% LiO; 10% LFP batteries. <sup>4</sup> 75% LFP; 20% LIO; 5% NCM batteries. <sup>5-6</sup> 75% LFP; 20% LIO; 5% NCM batteries [13].

**Table S11.** High material intensity scenario for electromobility in g/unit.

| Material | Electric bike and Electric scooter <sup>1</sup> | Electric motorcycle <sup>2</sup> | Electric vehicle <sup>3</sup> [80] | Electric bus <sup>4</sup> | Electric light-duty truck <sup>5</sup> | Electric heavy-duty truck <sup>6</sup> |
|----------|-------------------------------------------------|----------------------------------|------------------------------------|---------------------------|----------------------------------------|----------------------------------------|
| Ag       | 0.13                                            | 1.36                             | 34.67                              | 61.65                     | 57.41                                  | 63.33                                  |
| Al       | 776.83                                          | 6,018.76                         | 161,464.68                         | 473,985.13                | 194,535.64                             | 420,830.07                             |
| As       | 0.01                                            | 0.05                             | 0.88                               | 4.51                      | 1.36                                   | 2.67                                   |
| Au       | 0.01                                            | 0.10                             | 2.41                               | 4.40                      | 4.12                                   | 4.37                                   |
| B        | 0.10                                            | 1.34                             | 57.24                              | 91.58                     | 61.06                                  | 129.74                                 |
| Ba       | 22.31                                           | 108.97                           | 1,634.15                           | 9,330.81                  | 2,223.94                               | 5,175.87                               |
| Be       | 0.00                                            | 0.00                             | 0.05                               | 0.08                      | 0.06                                   | 0.07                                   |

---

|    |           |           |            |              |              |              |
|----|-----------|-----------|------------|--------------|--------------|--------------|
| Bi | 0.52      | 2.60      | 34.50      | 213.10       | 51.94        | 118.56       |
| Cd | 0.00      | 0.01      | 0.24       | 0.48         | 0.32         | 0.45         |
| Ce | 0.00      | 0.01      | 0.14       | 0.94         | 0.20         | 0.51         |
| Co | 0.28      | 397.21    | 3,215.56   | 1,630.26     | 785.56       | 1,862.92     |
| Cr | 28.13     | 270.78    | 6,534.84   | 21,201.35    | 8,574.10     | 20,449.82    |
| Cu | 166.40    | 2,037.75  | 59,517.26  | 115,395.34   | 79,667.95    | 127,748.59   |
| Dy | 0.10      | 1.42      | 59.73      | 95.69        | 64.52        | 134.64       |
| Er | -         | -         | -          | -            | -            | -            |
| Eu | 0.00      | 0.00      | 0.00       | 0.00         | 0.00         | 0.00         |
| Fe | 11,756.20 | 61,474.94 | 899,775.17 | 5,348,064.61 | 1,387,791.77 | 3,362,505.31 |
| Ga | 0.00      | 0.01      | 0.50       | 0.88         | 0.74         | 1.04         |
| Gd | 0.00      | 0.00      | 0.00       | 0.01         | 0.00         | 0.00         |
| Ge | 0.00      | 0.00      | 0.01       | 0.01         | 0.01         | 0.01         |
| Hf | -         | -         | -          | -            | -            | -            |
| Hg | 0.00      | 0.00      | 0.02       | 0.08         | 0.04         | 0.09         |
| Ho | -         | -         | -          | -            | -            | -            |
| In | 0.00      | 0.00      | 0.09       | 0.14         | 0.14         | 0.14         |
| Ir | 0.00      | 0.00      | 0.00       | 0.00         | 0.00         | 0.00         |
| La | 0.05      | 0.26      | 3.67       | 20.84        | 4.74         | 11.37        |
| Li | 27.52     | 466.39    | 7,834.37   | 43,264.02    | 20,031.86    | 50,070.92    |
| Lu | -         | -         | -          | -            | -            | -            |
| Mg | 17.29     | 109.82    | 2,339.42   | 7,708.20     | 3,486.16     | 5,458.22     |
| Mn | 308.19    | 805.25    | 9,651.34   | 37,775.06    | 9,966.70     | 23,801.76    |
| Mo | 7.39      | 40.13     | 559.19     | 3,328.94     | 870.98       | 2,106.55     |
| Nb | 2.98      | 15.37     | 198.23     | 1,291.62     | 309.90       | 766.10       |
| Nd | 1.55      | 21.57     | 972.90     | 1,457.99     | 982.67       | 2,052.13     |
| Ni | 7.64      | 3,197.21  | 27,035.41  | 15,472.18    | 7,002.65     | 16,346.27    |
| Os | -         | -         | -          | -            | -            | -            |
| Pb | 0.30      | 2.77      | 11,561.68  | 215.52       | 148.13       | 213.04       |
| Pd | 0.00      | 0.02      | 0.42       | 0.64         | 0.62         | 0.65         |
| Pr | 0.02      | 0.24      | 9.29       | 12.16        | 10.49        | 14.25        |
| Pt | 0.00      | 0.00      | 0.06       | 0.10         | 0.07         | 0.11         |
| Re | -         | -         | -          | -            | -            | -            |
| Rh | 0.00      | 0.00      | 0.00       | 0.00         | 0.00         | 0.00         |
| Ru | 0.00      | 0.00      | 0.04       | 0.07         | 0.05         | 0.08         |
| Sb | 0.41      | 3.53      | 129.99     | 224.98       | 122.90       | 197.11       |
| Sc | -         | -         | -          | -            | -            | -            |
| Se | 0.00      | 0.03      | 0.58       | 1.16         | 1.13         | 1.15         |
| Sm | -         | -         | -          | -            | -            | -            |
| Sn | 1.50      | 14.43     | 392.53     | 696.41       | 574.84       | 670.71       |
| Sr | 2.74      | 17.38     | 326.28     | 1,180.53     | 551.19       | 810.74       |
| Ta | 0.04      | 0.41      | 11.51      | 17.59        | 17.09        | 18.22        |
| Tb | 0.00      | 0.05      | 2.24       | 3.58         | 2.39         | 5.08         |
| Te | 0.00      | 0.00      | 0.04       | 0.05         | 0.05         | 0.06         |
| Ti | 13.25     | 68.66     | 1,359.72   | 5,817.63     | 1,519.82     | 3,500.93     |
| Tl | 0.00      | 0.00      | 0.00       | 0.00         | 0.00         | 0.00         |
| Tm | -         | -         | -          | -            | -            | -            |
| V  | 1.92      | 10.30     | 146.42     | 857.82       | 219.88       | 535.90       |
| W  | 0.08      | 0.41      | 5.24       | 33.92        | 8.04         | 18.72        |
| Y  | 0.00      | 0.01      | 0.10       | 0.20         | 0.20         | 0.20         |
| Yb | 0.00      | 0.00      | 0.00       | 0.00         | 0.00         | 0.00         |

|    |       |        |          |           |          |           |
|----|-------|--------|----------|-----------|----------|-----------|
| Zn | 54.96 | 350.70 | 5,921.35 | 24,580.74 | 8,460.12 | 16,640.48 |
| Zr | 0.04  | 0.30   | 6.23     | 17.82     | 10.48    | 15.48     |

<sup>1</sup>LMO battery. <sup>2</sup>NMC battery. <sup>3</sup> 60% NMC 811; 30% LiO; 10% LFP batteries. <sup>4</sup> 75% LFP; 20% LIO; 5% NCM batteries. <sup>5-6</sup> 75% LFP; 20% LIO; 5% NCM batteries [13].

**Table S12.** Reserves and resources considered in tons [33]

| Material | Reserves        | Resources       |
|----------|-----------------|-----------------|
| Ag       | 530,000         | 1,308,000       |
| Al       | 28,000,000,000  | 75,000,000,000  |
| As       | 1,180,000       | 11,000,000      |
| Au       | 54,000          | 100,000         |
| B        | 380,000,000     | 410,000,000     |
| Ba       | 740,000,000     | 2,000,000,000   |
| Be       | 100,000         | 400,000         |
| Bi       | 370,000         | 680,000         |
| Cd       | 500,000         | 7,500,000       |
| Ce       | 31,700,000      | 31,700,000      |
| Co       | 7,600,000       | 120,000,000     |
| Cr       | 570,000,000     | 12,000,000,000  |
| Cu       | 880,000,000     | 6,350,000,000   |
| Dy       | 2,600,000       | 2,980,000       |
| Er       | -               | -               |
| Eu       | 244,333         | 244,333         |
| Fe       | 160,000,000,000 | 800,000,000,000 |
| Ga       | 5,200           | 1,000,000       |
| Gd       | 1,235,000       | 3,622,143       |
| Ge       | 2,500           | 440,000         |
| Hf       | -               | -               |
| Hg       | 94,000          | 600,000         |
| Ho       | -               | -               |
| In       | 11,000          | 47,100          |
| Ir       | 2,000           | 2,000           |
| La       | 6,000,000       | 22,600,000      |
| Li       | 22,000,000      | 89,000,000      |
| Lu       | -               | -               |
| Mg       | 2,400,000,000   | 12,000,000,000  |
| Mn       | 1,500,000,000   | 1,030,000,000   |
| Mo       | 16,000,000      | 20,000,000      |
| Nb       | 17,000,000      | 17,000,000      |
| Nd       | 8,750,000       | 16,700,000      |
| Ni       | 95,000,000      | 300,000,000     |
| Os       | -               | -               |
| Pb       | -               | -               |
| Pd       | 33,000          | 46,000          |
| Pr       | 2,000,000       | 4,800,000       |
| Pt       | 33,000          | 50,000          |
| Re       | -               | -               |
| Rh       | 7,000           | 7,000           |
| Ru       | 6,000           | 6,000           |

|    |             |               |
|----|-------------|---------------|
| Sb | 2,000,000   | 4,300,000     |
| Sc | -           | -             |
| Se | 100,000     | 172,000       |
| Sm | 2,900,000   | 2,900,000     |
| Sn | 4,900,000   | 76,200,000    |
| Sr | 6,800,000   | 1,000,000,000 |
| Ta | 140,000     | 317,060       |
| Tb | 566,104     | 566,104       |
| Te | 11,080      | 31,000        |
| Ti | 750,000,000 | 2,000,000,000 |
| Tl | -           | -             |
| Tm | -           | -             |
| V  | 24,000,000  | 63,000,000    |
| W  | 3,700,000   | 7,000,000     |
| Y  | -           | -             |
| Yb | 1,900,000   | 1,900,000     |
| Zn | 250,000,000 | 1,900,000,000 |
| Zr | 75,000,000  | 235,029,851   |

**Table S13.** Type of vehicle and activity in Reference scenario with electric equivalents.

| Vehicle type                             | Bus    | Heavy-duty truck | Light-duty truck | Van       | Car        | Motorbike |
|------------------------------------------|--------|------------------|------------------|-----------|------------|-----------|
| km/year [68], [69]                       | 52,951 | 47,543           | 14,844           | 14,467    | 12,266     | 2,903     |
| Vehicles [67]                            | 30,440 | 139,165          | 1,068,211        | 1,128,644 | 11,290,645 | 1,622,591 |
| kWh/100 km combustion vehicle [63], [69] | 478    | 546              | 71               | 67        | 64         | 42        |
| kWh/100 km electric vehicle              | 106    | 138              | 12               | 29        | 17         | 6         |

**Table S14.** Energy consumption by technology in land transport.

| Consumption in by technology kWh / 100 km <sup>1</sup> | Bus | High duty Truck | Light duty Truck | Van | Electric vehicle | Motorbikes | Train <sup>2</sup> |
|--------------------------------------------------------|-----|-----------------|------------------|-----|------------------|------------|--------------------|
| Electric                                               | 106 | 138             | 29               | 29  | 17               | 6          | 3.2                |
| Combustion                                             | 478 | 546             | 71               | 67  | 64               | 42         | 7.6                |

<sup>1</sup> Energy consumption for freight transportation, truck 0.296 kWh/tkm; train 0.1925 kWh/tkm [41]. In the efficient scenario, we have considered a 50% cargo change from high duty trucks to trains, 9% reduction demand in trucks for sharing loads in Van and light duty trucks [40]. It may be higher, but a deeper study must be performed.

<sup>2</sup> Final energy consumption in Train transportation with diesel lines is 943 GWh and with electric lines 2,672 GWh.

**Table S15.** Vehicles considered for each scenario

| Scenario | Bus | High duty Truck | Light duty Truck | Van | Electric vehicle | Motorbikes |
|----------|-----|-----------------|------------------|-----|------------------|------------|
|----------|-----|-----------------|------------------|-----|------------------|------------|

|                                          |        |         |           |           |            |           |
|------------------------------------------|--------|---------|-----------|-----------|------------|-----------|
| Reference Scenario<br>Bioregion vehicles | 30,440 | 139,165 | 1,068,211 | 1,128,644 | 11,290,645 | 1,622,591 |
| Trend Scenario                           | 37,337 | 170,694 | 1,310,222 | 1,416,124 | 14,166,521 | 2,048,613 |
| Efficient Scenario                       | 37,337 | 34,139  | 1,310,222 | 1,416,124 | 2,821,971  | 2,048,613 |

**Table S16.** Assumption for demand increase and consumption increase [50].

| Assumptions       | Bus  | High duty Truck | Light duty Truck | Van  | Electric vehicle | Motorbikes |
|-------------------|------|-----------------|------------------|------|------------------|------------|
| Demand increase   | 1.15 | 1.51            | 1.51             | 1.51 | 1.44             | 1.40       |
| Vehicles increase | 1.23 | 1.23            | 1.23             | 1.25 | 1.25             | 1.26       |

**Table S17.** Energy sources in Residential Sector. Reference scenario in GWh [62], [63], [64]

| Energy source    | Heating <sup>1</sup> | Cooling | Hot water | Cooking <sup>2</sup> | Lighting and appliances |
|------------------|----------------------|---------|-----------|----------------------|-------------------------|
| Electricity      | 5525                 | 1751    | 5603      | 6969                 | 55171                   |
| Natural gas      | 14760                | 0       | 13635     | 3474                 | 0                       |
| Carbon           | 649                  | 0       | 51        | 95                   | 0                       |
| Oil              | 22865                | 0       | 7043      | 2172                 | 0                       |
| Renewable energy | 28963                | 26      | 3453      | 309                  | 0                       |

<sup>1</sup> 80% energy reduction considered for electrified heating with heat pumps.<sup>2</sup> 49% energy reduction considered for electrified cooking with induction.**Table S18.** Heat demands along the year

| Month | %      |
|-------|--------|
| 1     | 13.31% |
| 2     | 12.28% |
| 3     | 11.32% |
| 4     | 8.06%  |
| 5     | 6.46%  |
| 6     | 5.33%  |
| 7     | 4.79%  |
| 8     | 4.50%  |
| 9     | 4.91%  |
| 10    | 7.09%  |
| 11    | 10.22% |
| 12    | 11.74% |

**Table S19.** Energy sources in service sectors. Reference scenario units in GWh [62], [63], [64]

| Subsector | Coal | Oil  | Natural Gas | Electricity | Renewable Energy | Waste no renewable |
|-----------|------|------|-------------|-------------|------------------|--------------------|
| Offices   | 0    | 4686 | 13811       | 34794       | 312              | 0                  |



|                                |   |      |      |       |     |    |
|--------------------------------|---|------|------|-------|-----|----|
| Health                         | 0 | 2052 | 2215 | 5235  | 52  | 0  |
| Trade                          | 0 | 2169 | 7382 | 20611 | 26  | 0  |
| Hospitality and<br>Restoration | 0 | 271  | 805  | 5772  | 216 | 0  |
| Education                      | 0 | 4723 | 1064 | 3385  | 63  | 0  |
| Other Services                 | 0 | 621  | 1738 | 4830  | 56  | 56 |

**Table S20.** Reference scenario. Energy demands in Aragon [55] in GWh

| Aragon     | Oil      | Coal  | Renewable<br>energy | Natural gas | Heat    | Waste | Electricity | Total    |
|------------|----------|-------|---------------------|-------------|---------|-------|-------------|----------|
| Industry   | 857.6    | 203.7 | 4,004.7             | 3,479.9     | 4,020.9 | -     | 5,201.7     | 17,768.5 |
| Transport  | 12,959.0 | -     | 286.5               | -           | -       | -     | 472.7       | 13,718.2 |
| Primary    | 3,753.3  | -     | 203.7               | 61.2        | 229.2   | -     | 333.6       | 4,581.0  |
| Households | 425.4    | -     | 1,115.3             | 1,751.4     | -       | -     | 2,029.1     | 5,321.2  |
| Services   | 222.2    | -     | 374.2               | 778.3       | -       | -     | 1,988.5     | 3,363.2  |
| Total      | 18,217.5 | 203.7 | 5,984.4             | 6,070.8     | 4,250.1 | -     | 10,025.5    | 44,752.1 |

**Table S21.** Reference scenario. Energy demands in Balearic Islands [56] in GWh

| Balearic<br>Islands | Oil      | Coal  | Renewable<br>energy | Natural gas | Heat | Waste | Electricity | Total    |
|---------------------|----------|-------|---------------------|-------------|------|-------|-------------|----------|
| Industry            | 160.8    | 211.5 | 25.6                | 28.0        | -    | 22.0  | 219.2       | 667.2    |
| Transport           | 7,999.5  | -     | -                   | -           | -    | -     | 5.9         | 8,005.4  |
| Primary             | 1,079.5  | -     | 1.5                 | -           | -    | -     | 91.2        | 1,172.2  |
| Households          | 620.8    | -     | 62.9                | 353.7       | -    | -     | 2,477.5     | 3,514.9  |
| Services            | 646.8    | -     | -                   | 484.1       | -    | -     | 2,821.5     | 3,952.4  |
| Total               | 10,507.4 | 211.5 | 89.9                | 865.8       | -    | 22.0  | 5,615.4     | 17,312.0 |

**Table S22.** Reference scenario. Energy demands in Catalonia [57] in GWh

| Catalonia | Oil      | Coal  | Renewable<br>energy | Natural gas | Heat | Waste   | Electricity | Total    |
|-----------|----------|-------|---------------------|-------------|------|---------|-------------|----------|
| Industry  | 4,335.7  | 243.1 | 1,346.8             | 19,851.2    | -    | 1,000.2 | 16,232.0    | 43,008.9 |
| Transport | 52,845.6 | -     | 3,108.7             | 330.3       | -    | -       | 1,044.4     | 57,328.9 |
| Primary   | 1,895.7  | -     | 139.6               | 133.7       | -    | -       | 386.1       | 2,555.1  |

|            |          |       |         |          |   |         |          |           |
|------------|----------|-------|---------|----------|---|---------|----------|-----------|
| Households | 3,772.8  | -     | 1,053.7 | 10,303.0 | - | -       | 10,205.3 | 25,334.8  |
| Services   | 2,608.6  | -     | 435.0   | 4,367.1  | - | 67.5    | 14,488.7 | 21,966.7  |
| Total      | 65,458.3 | 243.1 | 6,083.7 | 34,985.4 | - | 1,067.6 | 42,356.5 | 150,194.5 |

**Table S23.** Reference scenario. Energy demands in Valencian Community [58] in GWh

| Valencian Community | Oil      | Coal | Renewable energy | Natural gas | Heat | Waste | Electricity | Total    |
|---------------------|----------|------|------------------|-------------|------|-------|-------------|----------|
| Industry            | 2,733.1  | 11.6 | 1,732.9          | 19,317.4    | -    | -     | 7,222.2     | 31,017.2 |
| Transport           | 36,192.6 | -    | 1,895.7          | 162.8       | -    | -     | 1,453.8     | 39,704.8 |
| Primary             | 3,326.2  | -    | 23.3             | 58.2        | -    | -     | 686.2       | 4,093.8  |
| Households          | 1,791.0  | -    | 1,337.5          | 2,163.2     | -    | -     | 7,536.2     | 12,827.9 |
| Services            | 395.4    | -    | 407.1            | 1,849.2     | -    | -     | 7,594.4     | 10,246.0 |
| Total               | 44,438.2 | 11.6 | 5,396.3          | 23,550.8    | -    | -     | 24,492.8    | 97,889.7 |

**Table S24.** Reference scenario. Energy demands in Navarre [61] in GWh

| Navarre    | Oil     | Coal  | Renewable energy | Natural gas | Heat | Waste | Electricity | Total    |
|------------|---------|-------|------------------|-------------|------|-------|-------------|----------|
| Industry   | 125.4   | 990.8 | 786.9            | 4,070.2     | -    | -     | 2,649.2     | 8,622.6  |
| Transport  | 8,384.0 | -     | 552.0            | 29.7        | -    | -     | 38.6        | 9,004.2  |
| Primary    | 948.6   | -     | 9.4              | 132.6       | -    | -     | 148.6       | 1,239.2  |
| Households | 446.8   | -     | 247.5            | 2,183.1     | -    | -     | 1,507.6     | 4,384.9  |
| Services   | 21.0    | -     | 22.9             | 218.3       | -    | -     | 343.1       | 605.4    |
| Total      | 9,925.8 | 990.8 | 1,618.7          | 6,633.8     | -    | -     | 4,687.1     | 23,856.2 |

**Table S25.** Reference scenario. Energy demands in Basque Country [59], [60] in GWh

| Basque Country | Oil      | Coal  | Renewable energy | Natural gas | Heat  | Waste | Electricity | Total    |
|----------------|----------|-------|------------------|-------------|-------|-------|-------------|----------|
| Industry       | 1,651.5  | 279.1 | 2,186.4          | 7,943.3     | 186.1 | -     | 8,268.9     | 20,515.3 |
| Transport      | 22,457.5 | -     | 1,639.8          | -           | -     | -     | 174.5       | 24,271.8 |
| Primary        | 383.8    | -     | 11.6             | 11.6        | 11.6  | -     | 46.5        | 465.2    |
| Households     | 976.9    | -     | 535.0            | 3,209.9     | -     | -     | 2,616.8     | 7,338.5  |
| Services       | 302.4    | -     | 221.0            | 1,174.6     | -     | -     | 3,430.9     | 5,128.8  |
| Total          | 25,772.1 | 279.1 | 4,593.9          | 12,339.4    | 197.7 | -     | 14,537.5    | 57,719.7 |

**Table S26.** Reference scenario. Energy demands in Cantabria in GWh

| <b>Cantabria</b> | <b>Oil</b> | <b>Coal</b> | <b>Renewable energy</b> | <b>Natural gas</b> | <b>Heat</b> | <b>Waste</b> | <b>Electricity</b> | <b>Total</b> |
|------------------|------------|-------------|-------------------------|--------------------|-------------|--------------|--------------------|--------------|
| Industry         | 278.6      | 149.2       | 348.2                   | 1,014.6            | -           | -            | 1,591.1            | 3,381.7      |
| Transport        | 3,978.1    | -           | 258.4                   | 9.7                | -           | -            | 127.5              | 4,373.7      |
| Primary          | 321.6      | -           | 13.4                    | 7.4                | -           | -            | 67.7               | 410.1        |
| Households       | 226.9      | -           | 150.3                   | 370.4              | -           | -            | 1,054.5            | 1,802.0      |
| Services         | 118.5      | -           | 50.4                    | 164.6              | -           | -            | 1,226.2            | 1,559.7      |
| Total            | 4,923.8    | 149.2       | 820.6                   | 1,566.7            | -           | -            | 4,067.0            | 11,527.2     |

**Table S27.** Reference scenario. Energy demands in La Rioja in GWh

| <b>La Rioja</b> | <b>Oil</b> | <b>Coal</b> | <b>Renewable energy</b> | <b>Natural gas</b> | <b>Heat</b> | <b>Waste</b> | <b>Electricity</b> | <b>Total</b> |
|-----------------|------------|-------------|-------------------------|--------------------|-------------|--------------|--------------------|--------------|
| Industry        | 210.8      | 11.2        | 260.3                   | 794.6              | -           | -            | 636.7              | 1,913.6      |
| Transport       | 3,010.0    | -           | 193.2                   | 7.6                | -           | -            | 51.0               | 3,261.8      |
| Primary         | 243.4      | -           | 10.0                    | 5.8                | -           | -            | 27.1               | 286.3        |
| Households      | 171.7      | -           | 112.3                   | 290.1              | -           | -            | 421.9              | 996.0        |
| Services        | 89.7       | -           | 37.7                    | 128.9              | -           | -            | 490.6              | 746.9        |
| Total           | 3,725.6    | 11.2        | 613.5                   | 1,227.0            | -           | -            | 1,627.4            | 7,204.6      |

**Table S28.** Electricity balance. Reference scenario in GWh [66]

| <b>Energía</b>          | <b>Aragon</b> | <b>Balearic Islands</b> | <b>Valencian Community</b> | <b>Cantabria</b> | <b>Catalonia</b> | <b>La Rioja</b> | <b>Navarre</b> | <b>Basque Country</b> |
|-------------------------|---------------|-------------------------|----------------------------|------------------|------------------|-----------------|----------------|-----------------------|
| Demand                  | 10,109        | 4,942                   | 25,457                     | 3,906            | 43,840           | 1,621           | 4,844          | 14,955                |
| Renewable generation    | 12,329        | 122                     | 4,488                      | 640              | 8,245            | 1,073           | 3,197          | 739                   |
| Electricity imports     | -7,997        | 1,427                   | 6,347                      | 2,100            | 888              | -171            | -1,767         | 8,788                 |
| Conventional generation | 5,713         | 3,393                   | 14,622                     | 996              | 34,708           | 719             | 3,414          | 5,429                 |

**Table S29.** Renewable energy resources by autonomous community

| <b>Biomass [75]</b> | <b>Biogas [74]</b> | <b>Wind resource<sup>1</sup> [42]</b> | <b>Roof PV<sup>2</sup> [76]</b> |
|---------------------|--------------------|---------------------------------------|---------------------------------|
|---------------------|--------------------|---------------------------------------|---------------------------------|

| Unit                | GWh    | GWh   | km2    | km2 |
|---------------------|--------|-------|--------|-----|
| Aragon              | 15,214 | 2,430 | 11,850 | 76  |
| Balearic Islands    | 2,263  | 298   | 550    | 37  |
| Cantabria           | 2,451  | 652   | 750    | 14  |
| Catalonia           | 15,018 | 3,817 | 3,875  | 255 |
| Valencian Community | 6,879  | 1,746 | 2,250  | 190 |
| Navarre             | 6,030  | 515   | 3,600  | 37  |
| Basque Country      | 4,520  | 313   | 975    | 56  |
| La Rioja            | 1,883  | 240   | 925    | 18  |

<sup>1</sup>Land area with an average speed higher than 6 m/s respecting protected areas.

<sup>2</sup> Katalin et al. [77] estimate an available building area of 462 km2 with an energy production of 65,244 GWh/year for Spain

**Table S30.** Nameplate Capacity by technology and autonomous community in Reference scenario [66]

| MW 2020            | Aragon  | Balearic Islands | Valencian Community | Cantabria | Catalonia | La Rioja | Navarre | Basque Country |
|--------------------|---------|------------------|---------------------|-----------|-----------|----------|---------|----------------|
| Hydro              | 1,338.3 | -                | 641.9               | 98.9      | 1,922.1   | 52.4     | 237.7   | 177.7          |
| Pumped hydro       | 219.1   | -                | 1,512.0             | 360.6     | 439.8     | -        | -       | -              |
| Nuclear            | -       | -                | 1,063.9             | -         | 3,032.8   | -        | -       | -              |
| Coal               | -       | 241.2            | -                   | -         | -         | -        | -       | -              |
| Fuel/gas           | -       | 742.5            | 8.0                 | -         | -         | -        | -       | -              |
| Combined-cycle     | 1,869.7 | 822.9            | 2,853.5             | -         | 3,788.2   | 784.7    | 1,222.3 | 1,968.1        |
| HidroWind          | -       | -                | -                   | -         | -         | -        | -       | -              |
| Wind               | 4,284.0 | 3.6              | 1,243.0             | 35.3      | 1,271.2   | 448.1    | 1,302.3 | 154.3          |
| PV                 | 1,098.2 | 103.3            | 364.4               | 2.2       | 279.9     | 98.8     | 163.4   | 50.2           |
| CSP                | -       | -                | 49.9                | -         | 24.3      | -        | -       | -              |
| Others renewables  | 6.7     | 2.1              | 12.6                | 12.9      | 63.8      | 3.6      | 42.7    | 27.4           |
| Cogeneration       | 514.2   | 11.5             | 451.4               | 280.7     | 983.9     | 22.9     | 151.5   | 445.1          |
| No renewable waste | 49.9    | 37.4             | 63.1                | 5.0       | 32.4      | -        | -       | 59.0           |
| Renovable waste    | -       | 37.4             | -                   | 5.0       | 27.2      | -        | -       | 46.8           |

**Table S31.** Full load hours considered by autonomous community and technology\*

| Technology | Full load hours | Aragon   | Balearic Islands | Valencian Community | Cantabria | Catalonia | La Rioja | Navarre  | Basque Country | Average  |
|------------|-----------------|----------|------------------|---------------------|-----------|-----------|----------|----------|----------------|----------|
| Hydro      | REE [66]        | 1,903.07 | -                | 684.04              | 2,324.33  | 1,809.21  | 2,917.14 | 2,147.22 | 2,178.68       | 1,903.07 |
| Wind       | Atlas [42]      | 2,150    | 2,250            | 2,175               | 2,475     | 2,350     | 2,175    | 2,275    | 2,400          | 2,281    |
|            | REE [66]        | 2,267    | 1,673            | 2,157               | 2,065     | 2,402     | 2,176    | 2,206    | 2,133          | 2,135    |
|            | Average         | 2,209    | 1,961            | 2,166               | 2,270     | 2,376     | 2,176    | 2,241    | 2,267          | 2,208    |
| PV         | PVGIS [73]      | 1,614    | 1,536            | 1,652               | 1,176     | 1,568     | 1,397    | 1,367    | 1,150          | 1,433    |

|          |       |       |       |       |       |       |       |       |       |
|----------|-------|-------|-------|-------|-------|-------|-------|-------|-------|
| REE [66] | 1,371 | 1,145 | 1,444 | 1,015 | 1,355 | 1,447 | 1,708 | 1,226 | 1,339 |
| Average  | 1,493 | 1,340 | 1,548 | 1,095 | 1,461 | 1,422 | 1,537 | 1,188 | 1,386 |

\* We have considered that by 2,050 there will be a full load hour increase, considering 2,600 full load hours in wind technology and 1,590 in PV technology as average values for the Bioregion. 2,910 full load hour for CSP and 2,300 full load hour for biomass and biogas power plants used upon request.

**Table S32.** 2030 Bioregion electricity balance. Trend scenario in GWh

|                         | Aragon  | Balearic Islands | Valencian Community | Cantabria | Catalonia | La Rioja | Navarre | Basque Country |
|-------------------------|---------|------------------|---------------------|-----------|-----------|----------|---------|----------------|
| Electricity Demand      | 11,122  | 6,286            | 28,307              | 4,446     | 49,147    | 1,779    | 5,309   | 17,320         |
| Renewable generation    | 30,056  | 561              | 6,785               | 2,082     | 9,682     | 1,935    | 6,985   | 1,174          |
| Electricity imports     | -23,346 | 3,803            | 7,738               | 1,324     | 18,982    | -1,433   | -5,308  | 9,775          |
| Conventional generation | 4,412   | 1,922            | 13,784              | 1,039     | 20,483    | 1,278    | 3,632   | 6,371          |

**Table S33.** 2030 Bioregion electricity balance. Balanced scenario in GWh

|                         | Aragon | Balearic Islands | Valencian Community | Cantabria | Catalonia | La Rioja | Navarre | Basque Country |
|-------------------------|--------|------------------|---------------------|-----------|-----------|----------|---------|----------------|
| Demand                  | 11,122 | 6,286            | 28,307              | 4,446     | 49,147    | 1,779    | 5,309   | 17,320         |
| Renewable generation    | 13,857 | 4,735            | 15,381              | 3,409     | 31,473    | 1,560    | 4,028   | 11,972         |
| Electricity imports     | -7,257 | -371             | -1,672              | -263      | -2,903    | -1,059   | -2,352  | -1,023         |
| Conventional generation | 4,521  | 1,922            | 14,598              | 1,300     | 20,578    | 1,278    | 3,632   | 6,371          |

**Table S34.** 2050 Trend scenario. Energy demands in the Bioregion in GWh

| Sector     | Oil    | Coal  | Renewable energy | Natural gas | Heat  | Waste | Electricity |
|------------|--------|-------|------------------|-------------|-------|-------|-------------|
| Industry   | 2,499  | 1,250 | 30,543           | 0           | 4,286 | 1,250 | 74,699      |
| Transport  | 0      | 0     | 0                | 0           | 0     | 0     | 78,680      |
| Primary    | 11,952 | 0     | 2,001            | 0           | 116   | 0     | 2,890       |
| Households | 0      | 0     | 4,857            | 0           | 0     | 0     | 36,562      |
| Services   | 0      | 0     | 1,761            | 0           | 0     | 0     | 40,030      |
| Total      | 14,451 | 1,250 | 39,162           | 0           | 4,402 | 1,250 | 232,861     |

**Table S35.** 2050 Bioregion electricity balance. Trend scenario in GWh

|                         | <b>Aragon</b> | <b>Balearic Islands</b> | <b>Valencian Community</b> | <b>Cantabria</b> | <b>Catalonia</b> | <b>La Rioja</b> | <b>Navarre</b> | <b>Basque Country</b> |
|-------------------------|---------------|-------------------------|----------------------------|------------------|------------------|-----------------|----------------|-----------------------|
| Demand                  | 22,406        | 9,844                   | 49,438                     | 7,457            | 91,261           | 3,996           | 12,448         | 35,500                |
| Renewable generation    | 173,468       | 4,695                   | 31,496                     | 9,583            | 27,114           | 8,397           | 29,758         | 925                   |
| Electricity imports     | -151,062      | 5,149                   | 17,942                     | -2,126           | 64,148           | -4,401          | -17,311        | 34,575                |
| Conventional generation | 0             | 0                       | 0                          | 0                | 0                | 0               | 0              | 0                     |

**Table S36.** 2050 Bioregion electricity balance. Balanced scenario in GWh

|                         | <b>Aragon</b> | <b>Balearic Islands</b> | <b>Valencian Community</b> | <b>Cantabria</b> | <b>Catalonia</b> | <b>La Rioja</b> | <b>Navarre</b> | <b>Basque Country</b> |
|-------------------------|---------------|-------------------------|----------------------------|------------------|------------------|-----------------|----------------|-----------------------|
| Demand                  | 22,406        | 9,844                   | 49,438                     | 7,457            | 91,261           | 3,996           | 12,448         | 35,500                |
| Renewable generation    | 76,001        | 10,670                  | 50,199                     | 7,632            | 84,572           | 9,390           | 21,087         | 25,885                |
| Electricity imports     | -53,595       | -826                    | -761                       | -174             | 6,689            | -5,394          | -8,639         | 9,615                 |
| Conventional generation | 0             | 0                       | 0                          | 0                | 0                | 0               | 0              | 0                     |

**Table S37.** 2050 Efficient scenario. Bioregion electricity balance. Trend scenario in GWh

|                         | <b>Aragon</b> | <b>Balearic Islands</b> | <b>Valencian Community</b> | <b>Cantabria</b> | <b>Catalonia</b> | <b>La Rioja</b> | <b>Navarre</b> | <b>Basque Country</b> |
|-------------------------|---------------|-------------------------|----------------------------|------------------|------------------|-----------------|----------------|-----------------------|
| Demand                  | 18,971        | 7,807                   | 39,516                     | 6,354            | 76,763           | 3,182           | 10,207         | 29,456                |
| Renewable generation    | 143,456       | 3,892                   | 26,684                     | 7,697            | 23,249           | 7,092           | 24,767         | 909                   |
| Electricity imports     | -124,485      | 3,915                   | 12,832                     | -1,343           | 53,514           | -3,910          | -14,560        | 28,547                |
| Conventional generation | 0             | 0                       | 0                          | 0                | 0                | 0               | 0              | 0                     |

**Table S38.** 2050 Efficient scenario. Bioregion electricity balance. Balanced scenario in GWh

|                         | <b>Aragon</b> | <b>Balearic Islands</b> | <b>Valencian Community</b> | <b>Cantabria</b> | <b>Catalonia</b> | <b>La Rioja</b> | <b>Navarre</b> | <b>Basque Country</b> |
|-------------------------|---------------|-------------------------|----------------------------|------------------|------------------|-----------------|----------------|-----------------------|
| Demand                  | 18,971        | 7,807                   | 39,516                     | 6,354            | 76,763           | 3,182           | 10,207         | 29,456                |
| Renewable generation    | 52,508        | 8,341                   | 45,176                     | 6,397            | 77,977           | 7,073           | 17,083         | 23,189                |
| Electricity imports     | -33,537       | -535                    | -5,661                     | -43              | -1,214           | -3,891          | -6,875         | 6,267                 |
| Conventional generation | 0             | 0                       | 0                          | 0                | 0                | 0               | 0              | 0                     |

**Table S39.** Nameplate Capacity by PV or wind technology and autonomous community in MW for scenarios

| <b>Technology</b> | <b>Scenario</b>          | <b>Aragon</b> | <b>Balearic Islands</b> | <b>Valencian Community</b> | <b>Cantabria</b> | <b>Catalonia</b> | <b>La Rioja</b> | <b>Navarre</b> | <b>Basque Country</b> |
|-------------------|--------------------------|---------------|-------------------------|----------------------------|------------------|------------------|-----------------|----------------|-----------------------|
| Wind              | 2020 [66]                | 4,284         | 4                       | 1,243                      | 35               | 1,271            | 448             | 1,302          | 154                   |
|                   | 2026 REE [38]            | 8,649         | 4                       | 1,515                      | 549              | 2,134            | 594             | 2,256          | 154                   |
|                   | 2030 Trend               | 9,689         | 4                       | 1,580                      | 672              | 2,340            | 629             | 2,484          | 154                   |
|                   | 2030 Balanced            | 4,284         | 1,284                   | 3,636                      | 855              | 6,697            | 448             | 1,302          | 3,036                 |
|                   | 2050 Trend               | 34,610        | 4                       | 3,133                      | 3,606            | 7,267            | 1,462           | 7,930          | 154                   |
|                   | 2050 Balanced            | 18,262        | 2,098                   | 9,000                      | 1,622            | 15,500           | 2,567           | 5,219          | 3,900                 |
|                   | 2050 efficient. Trend    | 28,452        | 4                       | 2,749                      | 2,881            | 6,049            | 1,256           | 6,584          | 154                   |
|                   | 2050 efficient. Balanced | 10770         | 1603                    | 9000                       | 1337             | 15500            | 1863            | 4156           | 3900                  |
|                   |                          |               |                         |                            |                  |                  |                 |                |                       |
| FV                | 2020 [66]                | 1,098         | 103                     | 364                        | 2                | 280              | 99              | 163            | 50                    |
|                   | 2026 REE [38]            | 2,838         | 203                     | 845                        | 2                | 368              | 196             | 351            | 52                    |
|                   | 2030 Trend               | 4,017         | 271                     | 1,171                      | 2                | 427              | 261             | 479            | 54                    |
|                   | 2030 Balanced            | 1,200         | 1,544                   | 4,371                      | 1,028            | 8,050            | 300             | 200            | 3,650                 |
|                   | 2050 Trend               | 41,720        | 2,438                   | 11,594                     | 2                | 2,334            | 2,363           | 4,552          | 97                    |
|                   | 2050 Balanced            | 7,168         | 2,770                   | 13,756                     | 2,022            | 25,001           | 1,181           | 3,535          | 9,667                 |
|                   | 2050 efficient. Trend    | 34,470        | 2,021                   | 9,590                      | 2                | 1,968            | 1,959           | 3,769          | 89                    |
|                   | 2050 efficient. Balanced | 6201          | 2203                    | 10992                      | 1711             | 20925            | 955             | 2909           | 7972                  |
|                   |                          |               |                         |                            |                  |                  |                 |                |                       |

In order to validate the model, Figure S1 shows the electrical power system of the Bioregion for the 2050 scenario compared with those proposed by Jacobson [5] and the European Commission [45] for Spain. Comparatively, hydropower production is lower in our model because of the Bioregion's hydrological characteristics. In addition, thermal power production from renewable sources is lower when considering the Bioregion's renewable biomass and biogas production capacities. Thus, we have modelled a higher overproduction, which is the ratio of energy production to energy demand, due to the lower availability of manageable energy.

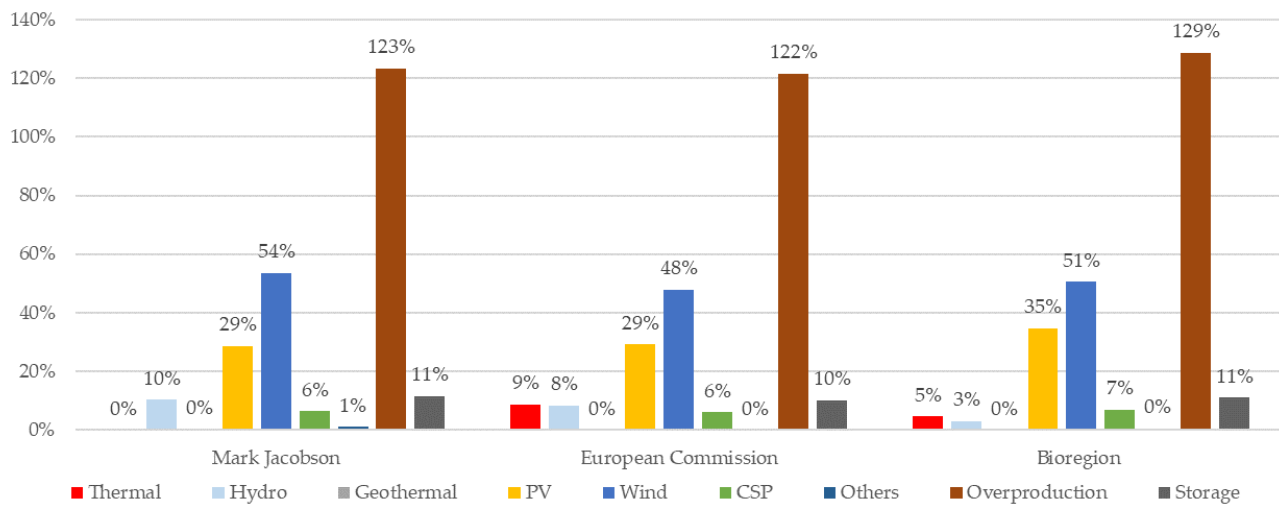

**Figure S1.** Comparative analysis of the electrical system for the 2050 scenario based on studies from Jacobson [5] and the European Commission [45] carried out for Spain, with respect to that of the Bioregion.

| Scenario | Wind MW | FV MW | CSP MW | Pumped Hydro MW | Bioenergy (thermal) MW | Train km | Trains | New transportation lines (new RES MW) | e-bikes e-scooters | Electric motorcycles | Electric cars | Electric Buses | Light duty trucks | high duty trucks | Batteries for storage NM C 50% - LFP 50% in kWh (5 hours of storage) | New heat pumps | Electric vehicles |
|----------|---------|-------|--------|-----------------|------------------------|----------|--------|---------------------------------------|--------------------|----------------------|---------------|----------------|-------------------|------------------|----------------------------------------------------------------------|----------------|-------------------|
| 2030     | 128     | 181   |        | 153             |                        | 89       | 35     | 2807                                  | 195                | 395                  | 168           | 741            | 260               |                  | 5459                                                                 | 236            | 168               |
|          | 01.2    | 83.5  | 100.   | 1.41            | 0                      | 03.      | 6.1    | 0.499                                 | 456                | 329.                 | 196           | 6.44           | 259.              |                  | 976.2                                                                | 569            | 196               |
|          | 951     | 866   | 1      | 413             |                        | 64       | 45     | 24                                    | 7.96               | 165                  | 7.10          | 545            | 816               | 0                | 3                                                                    | 7.19           | 7.10              |
|          | 4       | 1     |        | 3               |                        | 5        | 8      |                                       | 3                  | 8                    | 1             | 7              | 8                 |                  |                                                                      | 3              | 1                 |
| 2050     | 494     | 629   |        | 560             |                        | 17       | 71     | 1091                                  | 586                | 204                  | 155           | 373            | 131               | 170              | 2906                                                                 | 409            | 155               |
|          | 24.6    | 40.3  | 689    | 6.79            | 600                    | 80       | 2.2    | 34.10                                 | 370                | 861                  | 826           | 36.5           | 022               | 693.             | 5444.                                                                | 265            | 826               |
|          | 321     | 596   | 7.41   | 452             | 0                      | 7.2      | 91     | 65                                    | 3.88               | 2.52                 | 45.6          | 081            | 2.37              | 506              | 73                                                                   | 6.14           | 45.6              |
|          | 9       | 6     |        | 5               |                        | 9        | 6      |                                       | 8                  | 8                    | 1             | 5              | 4                 | 9                |                                                                      | 4              | 1                 |
| 2050 Eff | 393     | 517   | 569    | 420             | 496                    | 17       | 55     | 8806                                  | 586                | 204                  | 423           | 373            | 131               | 853              | 2405                                                                 | 409            | 423               |
|          | 87.7    | 06.9  | 4.43   | 2.49            | 4.67                   | 80       | 53     | 4.971                                 | 370                | 861                  | 809           | 36.5           | 022               | 46.7             | 0097.                                                                | 265            | 809               |
| icient   | 972     | 889   | 531    | 731             | 839                    | 7.2      | 5.8    | 53                                    | 3.88               | 2.52                 | 5.29          | 081            | 2.37              | 534              | 57                                                                   | 6.14           | 5.29              |
|          |         | 4     | 3      | 9               | 2                      | 9        | 36     |                                       | 8                  | 8                    | 2             | 5              | 4                 | 4                |                                                                      | 4              | 2                 |
